# Erratum

Wright A, Burden ACF, Paisey RB, Cull CA, Holman RR, for the U.K. Prospective Diabetes Study Group: Sulfonylurea inadequacy: efficacy of addition of insulin over 6 years in patients with type 2 diabetes in the U.K. Prospective Diabetes Study (UKPDS 57). *Diabetes Care* 25:330–336, 2002

On page 334 of the above-listed article, eight lines below the heading “Hypoglycemia,” the sentence beginning “In those patients [. . .]” should read as follows:

In those patients randomized to the CI [chlorpropamide  $\pm$  insulin] or GI [glipizide  $\pm$  insulin] groups, and requiring additional insulin therapy, the rates of major hypoglycemic episodes were similar to those in the I [insulin] group (5.8% [95% confidence intervals 2.3–9.3] and 2.8% [0.4–5.2] per annum, respectively).
